# Supplementary material for: Pneumatosis Intestinalis Induced by Alpha-Glucosidase Inhibitors in Patients with Diabetes Mellitus
Source: MDPI journal article supplement (doi:10.3390/jcm11195918), 2022-10-07
Supplement: s1 [file s1]

**Supplemental Table S1.** Clinical features of patients without comorbidities (N = 10).

| Reference                              | Age /Sex | Diabetes mellitus duration | Concomitant medications     | Alpha-glucosidase/ dose/ duration                             | Symptoms                                                                  | Locations                                               | Gas in cavities                         | Surgery                      | Recovered (radiology confirmed) |
|----------------------------------------|----------|----------------------------|-----------------------------|---------------------------------------------------------------|---------------------------------------------------------------------------|---------------------------------------------------------|-----------------------------------------|------------------------------|---------------------------------|
| Hayakawa, et al., 1999 <sup>[13]</sup> | 64/F     | DM II/20 years             | Insulin; antilipemic agents | Voglibose/ 0.6 mg daily / 2 months                            | Abdominal distension                                                      | Ascending and proximal transverse colon.                | x                                       | x                            | 4 days                          |
| Yanaru, et al., 2002 <sup>[14]</sup>   | 61/M     | Unknown                    | Sulfonylurea                | Voglibose/ 0.6mg daily/5 years                                | Abdominal distension, constipation, hematochezia                          | Sigmoid colon                                           | x                                       | x                            | 28 days                         |
| Furio, et al., 2006 <sup>[15]</sup>    | 64/F     | Unknown                    | Insulin                     | Acarbose/ unknown/ 3 years                                    | Abdominal pain, diarrhea, tenesmus, weight loss                           | Cecum, ascending colon, transverse colon, sigmoid colon | x                                       | x                            | 15 days                         |
| Kojima, et al., 2010 <sup>[12]</sup>   | 58/M     | Unknown                    | N/A                         | Miglitol/ 150 mg daily/ 8 months                              | Abdominal pain, rectal bleeding                                           | Ileocecal region, ascending colon                       | Pneumoperitoneum, Pneumoretroperitoneum | x                            | 12 days                         |
| Wu & Bao, 2011 <sup>[16]</sup>         | 67/F     | Unknown                    | N/A                         | Acarbose/ unknown/ unknown                                    | N/A                                                                       | Ascending colon                                         | x                                       | x                            | 3 months                        |
| Tseng, et al., 2011 <sup>[17]</sup>    | 76/F     | Unknown                    | N/A                         | $\alpha$ -glucosidase inhibitor (undefined)/ unknown/ 5 years | Abdominal pain, chest pain, dyspnea                                       | Ascending colon                                         | x                                       | Laparotomy and hemicolectomy | Unknown                         |
| Takase, et al., 2017 <sup>[18]</sup>   | 78/F     | 3 years                    | Sitagliptin                 | Voglibose/ 0.6 mg daily/ 2 weeks                              | Abdominal pain                                                            | Small intestine                                         | x                                       | x                            | 11 days                         |
| Liao, et al., 2017 <sup>[19]</sup>     | 50/M     | Unknown                    | N/A                         | Acarbose/ 150 mg daily/ 1 year                                | Abdominal pain, fever, diarrhea                                           | All colon                                               | x                                       | x                            | Undefined                       |
| Wang, et al., 2018 <sup>[20]</sup>     | 72/F     | 10 years                   | Insulin                     | Acarbose/ unknown/ 10 years                                   | Constipation then diarrhea, abdominal distension, bloody and mucous stool | Ascending colon; sigmoid colon                          | x                                       | x                            | 6 months                        |
| Lin and Wang, 2019 <sup>[21]</sup>     | 65/M     | Unknown                    | N/A                         | Acarbose/unknown/ 3 years                                     | Positive fecal occult blood test                                          | Sigmoid colon                                           | x                                       | x                            | 6 months                        |

**Supplemental Table S2. Clinical features of patients with comorbidities (N = 19)**

| Reference                                   | Age/Sex      | Diabetes' duration | Diseases other than diabetes                                                                            | Concomitant medications             | Alpha-glucosidase/ dose/duration            | PI symptoms                                                                           | Locations                                                | Gas in cavities 11/17                                                                               | Surgery                    | PI disappeared |
|---------------------------------------------|--------------|--------------------|---------------------------------------------------------------------------------------------------------|-------------------------------------|---------------------------------------------|---------------------------------------------------------------------------------------|----------------------------------------------------------|-----------------------------------------------------------------------------------------------------|----------------------------|----------------|
| Azami, 2000 <sup>[22]</sup>                 | 87/F         | 14 years           | Hypothyroidism; paralytic ileus                                                                         | Glibenclamide; maltitol             | Acarbose/150mg daily/ 2 years               | Abdominal distension, low appetite                                                    | Small intestine                                          | x                                                                                                   | x                          | 5 days         |
| Hisamoto, et al., 2006 <sup>[23]</sup>      | 56/F         | 7 days             | Non-specific interstitial pneumonitis (NSIP)                                                            | Prednisone                          | Voglibose/600mg daily/7 days                | N/A                                                                                   | Terminal ileum, ascending colon, transverse colon        | Pneumomediastinum, Pneumopericardium, Pneumoretroperitoneum                                         | x                          | 7 days         |
| Maeda, et al., 2006 <sup>[24]</sup>         | 72/ F        | Unknown            | Minimal change nephrotic syndrome; <i>E. Coli</i> sepsis                                                | Prednisolone; mizoribine; insulin   | Voglibose/ 0.9 mg daily/3 years             | Abdominal pain                                                                        | Small intestine (DIC, acute renal and pulmonary failure) | x                                                                                                   | x                          | Undefined      |
| Saito, et al., 2007 <sup>[25]</sup>         | 53/F         | 1 month            | Dermatomyositis                                                                                         | Prednisolone; methotrexate; insulin | Voglibose /0.6 mg/ 1 month                  | Abdominal flatulence, abdominal pain, nausea, a sense of irritation on the right neck | Ascending, descending colons, mesentery                  | Subcutaneous air in the cervical region, pneumomediastinum, pneumoperitoneum, pneumoretroperitoneum | x                          | 21 days        |
| Tsujimoto, et al., 2008 <sup>[26]</sup>     | 69/M         | 2.5 years          | Myasthenia gravis                                                                                       | Prednisolone; sulfonylurea          | Voglibose /unknown/ 1 year and 8 months     | Abdominal distension, constipation, bright rectal bleeding                            | Sigmoid colon                                            | Pneumoperitoneum                                                                                    | x                          | 2 weeks        |
| Vogel, et al., 2009 <sup>[27]</sup>         | 65/F         | 12 years           | Hypertension; post-hysterectomy/ovariectomy                                                             | N/A                                 | Acarbose/ 150 mg daily/12 years             | Abdominal pain                                                                        | Ascending colon                                          | Pneumoperitoneum                                                                                    | x                          | 3 months       |
| Shimajima, et al., 2011 <sup>[28]</sup>     | 48/M         | 4 weeks            | Neuropsychiatric systemic lupus erythematosus (NPSLE)                                                   | Prednisolone; glimepiride           | Voglibose X 2 weeks                         | N/A                                                                                   | Ascending colon                                          | x                                                                                                   | x                          | 13 weeks       |
| Imai, et al., 2012 <sup>[29]</sup>          | 87/M         | Unknown            | Hypertension                                                                                            | N/A                                 | Miglitol/225mg daily/7 years                | Abdominal pain, distension, nausea                                                    | Small intestine                                          | Pneumoperitoneum, ascites                                                                           | x                          | 7 days         |
| Tanabe, et al., 2013 <sup>[30]</sup>        | 80/F         | Unknown            | Hypertension; post cerebral infarction with right-side paralysis; post-cholecystectomy and hysterectomy | Antihypertensive (undefined)        | $\alpha$ -glucosidase inhibitor (undefined) | Abdominal bloating, abdominal pain                                                    | Small intestine                                          | Pneumoperitoneum                                                                                    | x                          | Unknown        |
| Makiyama, et al., 2014 <sup>[31]</sup>      | 80/F         | 2 days             | Acute cholecystitis                                                                                     | N/A                                 | Voglibose/ 0.6 mg daily/ x 2 days           | Abdominal distention, vomiting                                                        | Terminal ileum                                           | Portal venous gas                                                                                   | Exploratory laparotomy     | Undefined      |
| Ogo, et al., 2014 <sup>[32]</sup>           | 83/F         | Unknown            | Polymyalgia rheumatica                                                                                  | Prednisone; insulin                 | Acarbose/100mg t.i.d./unknown               | N/A                                                                                   | Ascending colon, transverse colon                        | pneumoperitoneum,                                                                                   | x                          | 3 weeks        |
| Rottenstreich, et al., 2015 <sup>[33]</sup> | 73/M         | Unknown            | Hypertension; ischemic heart disease; diabetic nephropathy                                              | N/A                                 | Acarbose/50 mg t.i.d./unknown               | Vomiting, constipation                                                                | Ileum, ascending colon                                   | Portal venous gas, pneumoperitoneum                                                                 | Exploratory laparotomy     | Undefined      |
| Ksiadzyna & Peña 2016 <sup>[4]</sup>        | 64/M/        | 8 Years            | Chronic mild non-specific colitis                                                                       | Metformin                           | Acarbose/150 mg daily/8 years               | Watery diarrhea, flatulence, abdominal pain                                           | Cecum, splenic flexure                                   | x                                                                                                   | x                          | 4 weeks        |
| Suzuki, et al., 2017 <sup>[34]</sup>        | 70/F         | 10 years           | Rheumatoid arthritis                                                                                    | Prednisolone                        | Voglibose/ undefined/10 years               | N/A                                                                                   | Colon                                                    | Pneumoperitoneum                                                                                    | x                          | 2 weeks        |
| Suzuki, et al., 2017 <sup>[34]</sup>        | 71/F         | <1 year            | Granulomatosis with polyangiitis                                                                        | Prednisolone                        | Voglibose/unknown/1 year                    | Nose pain                                                                             | Intestinal wall (undefined)                              | Pneumoperitoneum                                                                                    | x                          | 1 month        |
| Ling, et al., 2019 <sup>[35]</sup>          | 64/M         | 5 years            | Chronic inflammatory colitis                                                                            | N/A                                 | Acarbose/unknown/5 years                    | Bloody stool                                                                          | Sigmoid                                                  | x                                                                                                   | x                          | 3 months       |
| Police, et al., 2020 <sup>[36]</sup>        | 72/undefined | 10 years           | Sigmoid volvulus; dolichocolon; atrial fibrillation                                                     | N/A                                 | Acarbose/unknown/10 years                   | Abdominal pain, acute occlude syndrome                                                | Sigmoid                                                  | x                                                                                                   | Laparoscopic sigmoidectomy | Undefined      |

|                                      |      |         |                                                                                                                                                                                              |                                                                       |                                |                                                         |                                                                                               |                                           |   |         |
|--------------------------------------|------|---------|----------------------------------------------------------------------------------------------------------------------------------------------------------------------------------------------|-----------------------------------------------------------------------|--------------------------------|---------------------------------------------------------|-----------------------------------------------------------------------------------------------|-------------------------------------------|---|---------|
| Oda, et al., 2021 <sup>[37]</sup>    | 70/F | Unknown | Hypertension; cardiovascular disease, post cerebral infarction; chronic kidney failure due to diabetic nephropathy; peritoneal dialysis-peritonitis; nonocclusive mesenteric ischemia (NOMI) | Linagliptin; clopidogrel; aspirin; amlodipine; olmesartan; carvedilol | Voglibose/0.9 mg daily/unknown | Diarrhea, chill, low appetite, abdominal pain, Bp 86/50 | Ascending colon (with hemorrhage and ulcers in the entire right colon and the terminal ileum) | Portal venous gas                         | x | 4 days  |
| Otsuka, et al., 2021 <sup>[38]</sup> | 59/M | 4 years | Post lung transplantation for lung cancer and idiopathic pulmonary fibrosis 1031 days; pneumonia 47 days ago                                                                                 | Tacrolimus, prednisolone, insulin, oral acyclovir                     | Voglibose/0.9 mg daily/4 years | N/A                                                     | Ascending colon, transverse colon, descending colon                                           | Pneumoperitoneum<br>Pneumoretroperitoneum | x | 11 days |

Abbreviation: t.i.d. = three time a day; DIC = Disseminated Intravascular Coagulation.
